# Supplementary material
Source: Springer Nature journal article supplement (https://www.springermedizin.de/resource/supplementary/12943_2013_1159_MOESM6_ESM.pdf/9552634)

A

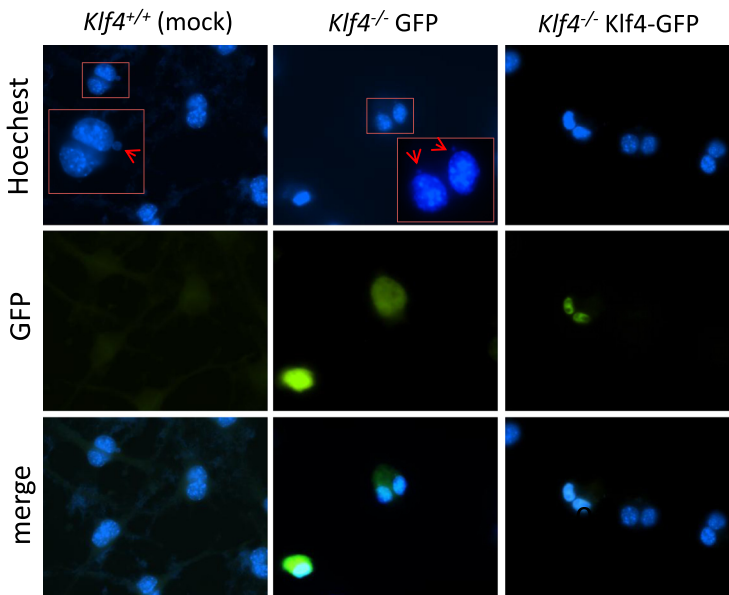

B

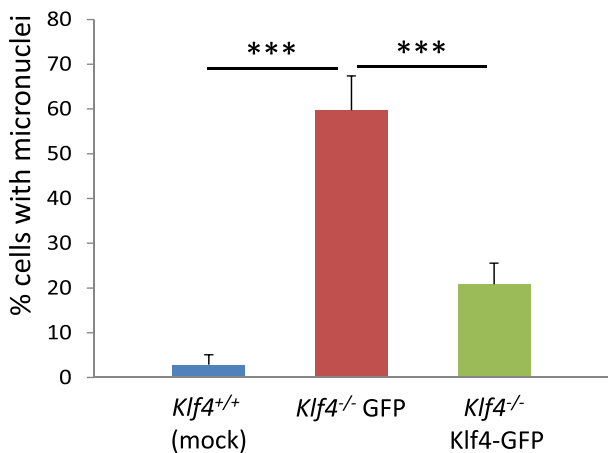

Supplement: MOESM6 [file 9552634]
